# Supplementary material for: An unusual ionic cocrystal of ponatinib hydrochloride: characterization by single-crystal X-ray diffraction and ultra-high field NMR spectroscopy
Source: Royal Society of Chemistry journal article supplement (doi:10.1039/d3ce01062g), 2024-01-01
Supplement: d3ce01062g1.pdf [file d3ce01062g1.pdf]

*ESI for:*

**An Unusual Ionic Cocrystal of Ponatinib Hydrochloride:  
Characterization by Single-Crystal X-ray Diffraction  
and Ultra-High Field NMR Spectroscopy**

Alexander J. Stirk,<sup>1,¥</sup> Sean T. Holmes,<sup>2,3,¥</sup> Fabio E. S. Souza,<sup>1</sup> Ivan Hung,<sup>3</sup>  
Zhehong Gan,<sup>3</sup> James F. Britten,<sup>4</sup> Allan W. Rey,<sup>1</sup> and Robert W. Schurko,<sup>2,3\*</sup>

<sup>1</sup> Apotex Pharmachem Inc., Brantford, ON, Canada N3T 6B8

<sup>2</sup> Department of Chemistry & Biochemistry, Florida State University, Tallahassee, FL 32306

<sup>3</sup> National High Magnetic Field Laboratory, Tallahassee, FL 32310

<sup>4</sup> MAX Diffraction Facility, McMaster University, Hamilton, ON, Canada

¥ - Denotes joint first authorship (these authors have contributed equally)

\* - Denotes corresponding author

**Table S1.** Summary of experimental parameters for the acquisition of  $^1\text{H} \rightarrow ^{13}\text{C}\{^1\text{H}\}$  ramped-amplitude CP/MAS spectra.

|                                                  |        |
|--------------------------------------------------|--------|
| Pulse sequence                                   | CP/MAS |
| Field / T                                        | 18.8   |
| $\nu_0(^1\text{H})$ / MHz                        | 800.12 |
| $\nu_0(^{13}\text{C})$ / MHz                     | 201.19 |
| Time domain size                                 | 12288  |
| Dwell time / ms                                  | 2.5    |
| Acquisition time / ms                            | 30.72  |
| Spectral width / kHz                             | 200    |
| Number of scans                                  | 1024   |
| Recycle delay / s                                | 30     |
| Spinning rate / kHz                              | 18     |
| $^1\text{H}$ Hartmann-Hahn matching field / kHz  | 75     |
| Contact time / ms                                | 2.0    |
| $^1\text{H}$ $\pi/2$ pulse width / $\mu\text{s}$ | 2.5    |
| SPINAL-64 $^1\text{H}$ decoupling field / kHz    | 75     |
| Total experiment time / h                        | 8.5    |

**Table S2.** Summary of experimental parameters for the acquisition of  $^1\text{H}$  1D and 2D BABA SQ–DQ spectra.

|                                                  | Hahn echo | BABA SQ–DQ           |
|--------------------------------------------------|-----------|----------------------|
| Pulse sequence                                   |           |                      |
| Field / T                                        | 18.8      | 18.8                 |
| $\nu_0(^1\text{H})$ / MHz                        | 800.12    | 800.12               |
| Time domain size                                 | 2048      | 1024 (F2); 48 (F1)   |
| Dwell time / ms                                  | 6.667     | 5.00                 |
| Acquisition time / ms                            | 13.65     | 5.12 (F2); 0.48 (F1) |
| Spectral width / kHz                             | 75        | 100 (F2); 50 (F1)    |
| Number of scans                                  | 8         | 16                   |
| Recycle delay / s                                | 6.5       | 6.5                  |
| Spinning rate / kHz                              | 50        | 50                   |
| $^1\text{H}$ $\pi/2$ pulse width / $\mu\text{s}$ | 2.5       | 2.5                  |
| Rotor periods in BABA recoupling                 | n/a       | 1                    |
| Total experiment time / min                      | 0.87      | 83.2                 |

**Table S3.** Summary of experimental parameters for the acquisition of  $^{35}\text{Cl}$  spectra.

| Pulse sequence                                                    | Hahn echo | Hahn echo | Hahn echo | Hahn echo |
|-------------------------------------------------------------------|-----------|-----------|-----------|-----------|
| Field / T                                                         | 9.4       | 18.8      | 35.2      | 35.2      |
| $\nu_0(^{35}\text{Cl})$ / MHz                                     | 39.22     | 78.39     | 146.98    | 146.98    |
| $\nu_0(^1\text{H})$ / MHz                                         | 400.24    | 800.12    | 1500.21   | 1500.21   |
| $\nu_{\text{rot}}$ / kHz                                          | 0         | 0         | 0         | 16        |
| Time domain size                                                  | 512       | 1024      | 1024      | 4096      |
| Dwell time / $\mu\text{s}$                                        | 2.0       | 1.667     | 5.0       | 2.5       |
| Acquisition time / ms                                             | 1.02      | 1.71      | 5.12      | 10.24     |
| Spectral width / kHz                                              | 250       | 300       | 100       | 200       |
| Number of scans                                                   | 102400    | 153600    | 16382     | 8192      |
| Recycle delay / s                                                 | 1.0       | 0.5       | 0.2       | 0.2       |
| $^{35}\text{Cl}$ $\pi/2$ CT selective pulse width / $\mu\text{s}$ | 3.75      | 1.67      | 5.0       | 5.0       |
| $^1\text{H}$ decoupling field / kHz                               | 35        | 40        | 0         | 0         |
| Total experiment time / h                                         | 28        | 21        | 0.9       | 0.5       |

**Table S4.** Summary of experimental parameters for the acquisition of the  $^{35}\text{Cl} \rightarrow ^1\text{H}$  D-RINEPT spectrum.

| Pulse sequence                                          | D-RINEPT                    |
|---------------------------------------------------------|-----------------------------|
| Field / T                                               | 18.8                        |
| $\nu_0(^1\text{H})$ / MHz                               | 800.12                      |
| Time domain size                                        | 1024 (F2); 128 (F1)         |
| Dwell time / ms                                         | 2.50                        |
| Acquisition time / ms                                   | 2.56 (F2); 0.64 (F1)        |
| Spectral width / kHz                                    | 200 (F2); 100 (F1)          |
| Number of scans                                         | 512                         |
| Recycle delay / s                                       | 0.5                         |
| Spinning rate / kHz                                     | 50                          |
| $^{35}\text{Cl}$ $\pi/2$ CT pulse width / $\mu\text{s}$ | 5.0                         |
| Rotor periods of $\text{SR4}_1^2$ recoupling            | 5                           |
| WURST pulse width / $\mu\text{s}$                       | 38 (followed by delay of 2) |
| WURST pulse rf / kHz                                    | 30 (max.)                   |
| WURST pulse offset / kHz                                | 300                         |
| Total experiment time / min                             | 18                          |

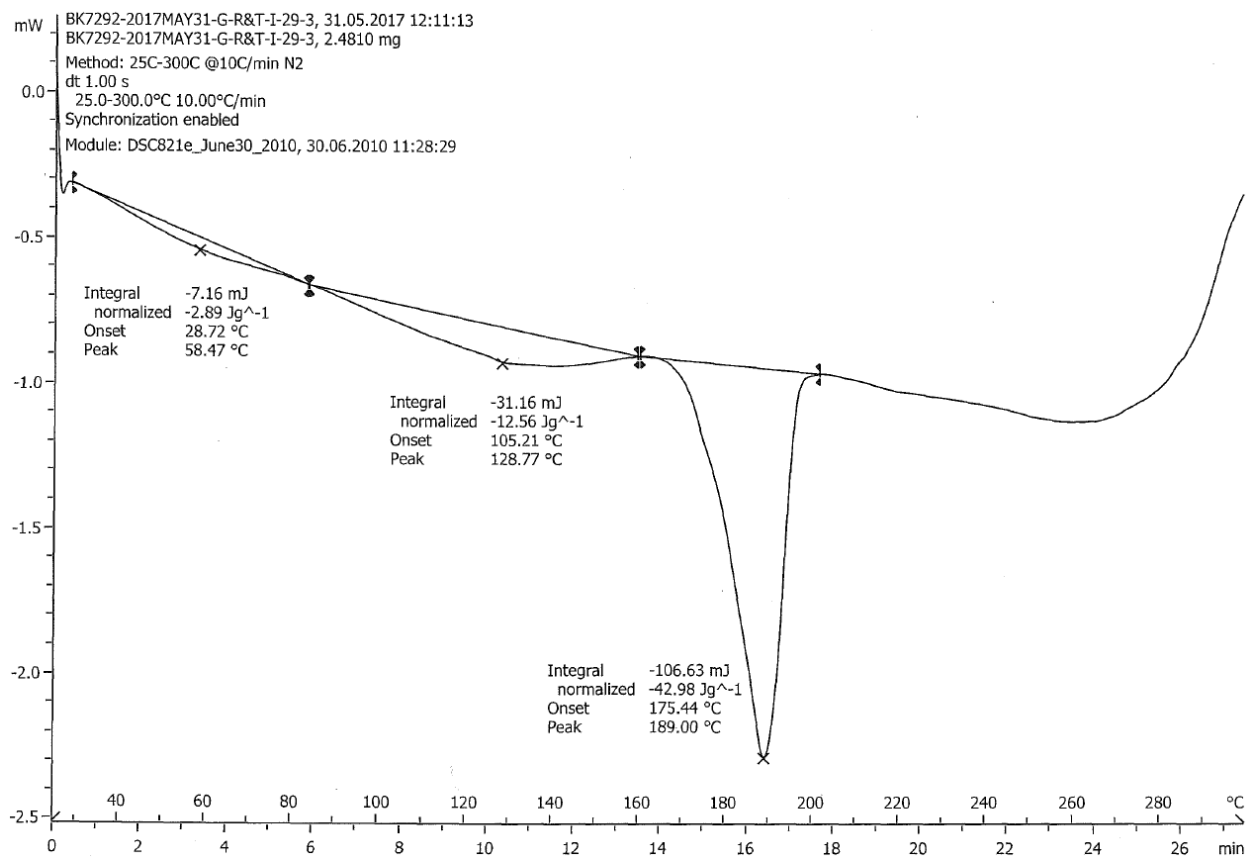

**Figure S1.** Differential scanning calorimetry (DSC) curve for **pon·HCl**.

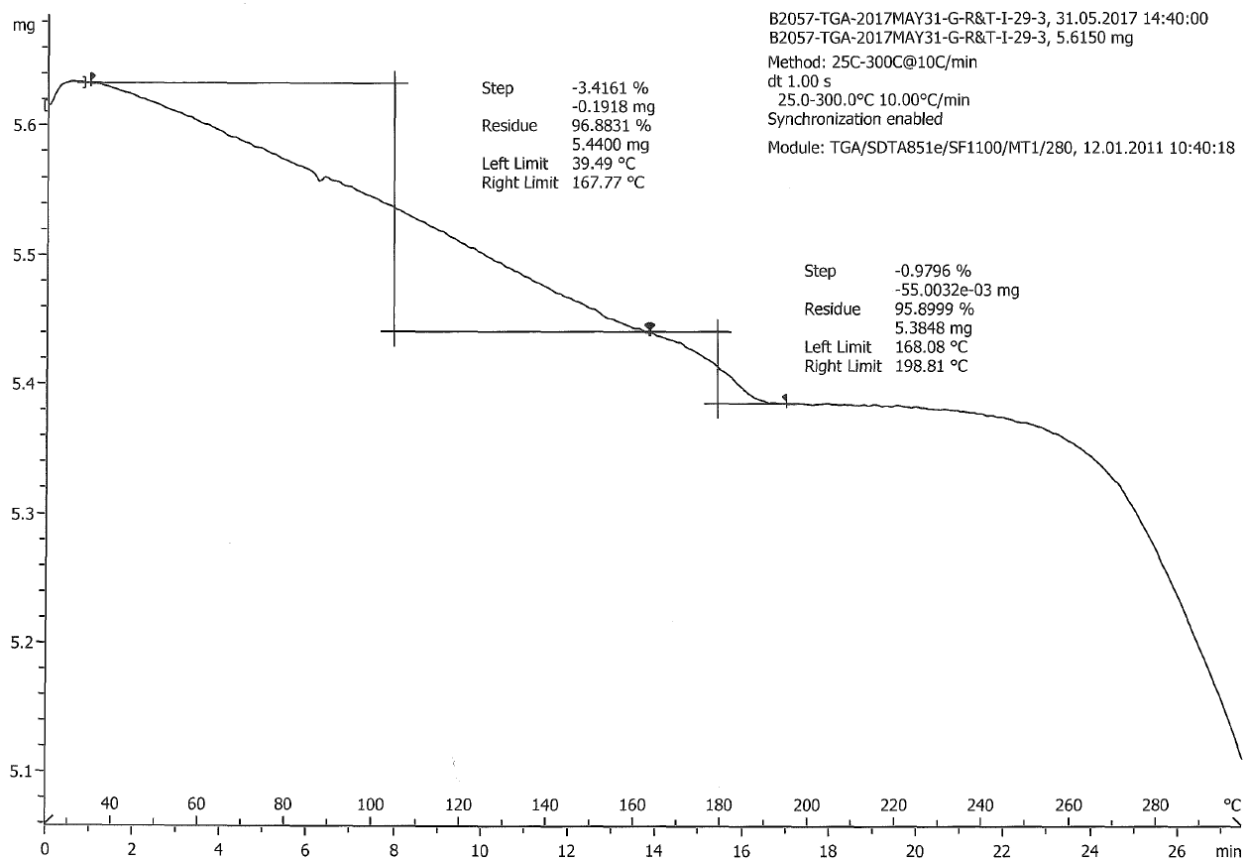

**Figure S2.** Thermogravimetric analysis (TGA) thermogram of **pon·HCl**.

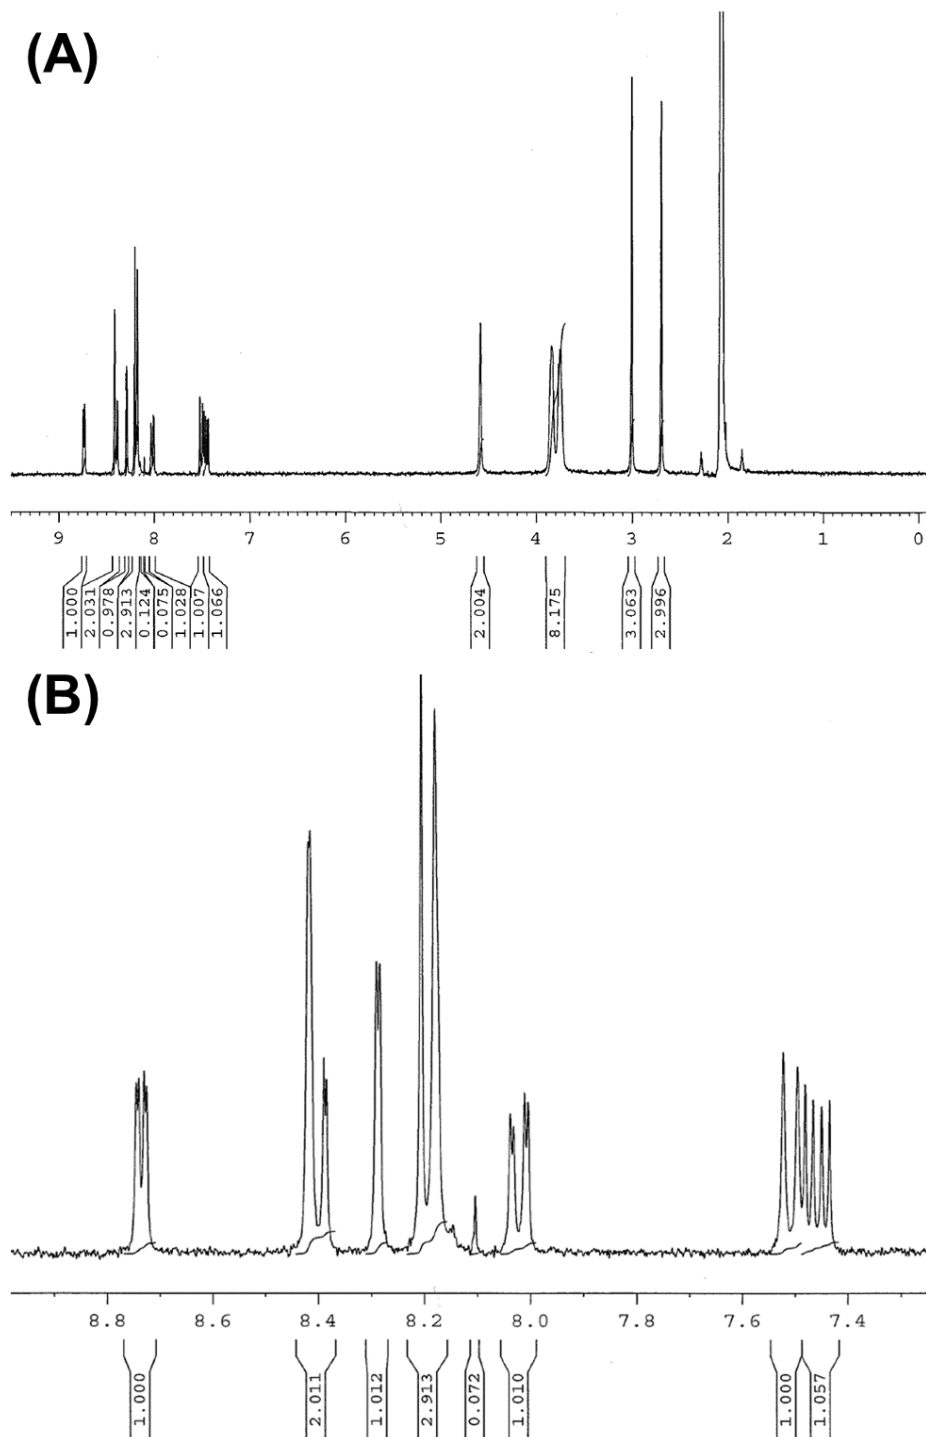

**Figure S3.** (A) Solution-state  $^1\text{H}$  NMR spectrum of **pon·HCl** in acetic acid- $d_3$ . (B) Detail from the solution-state  $^1\text{H}$  NMR spectrum of **pon·HCl** in acetic acid- $d_3$ .

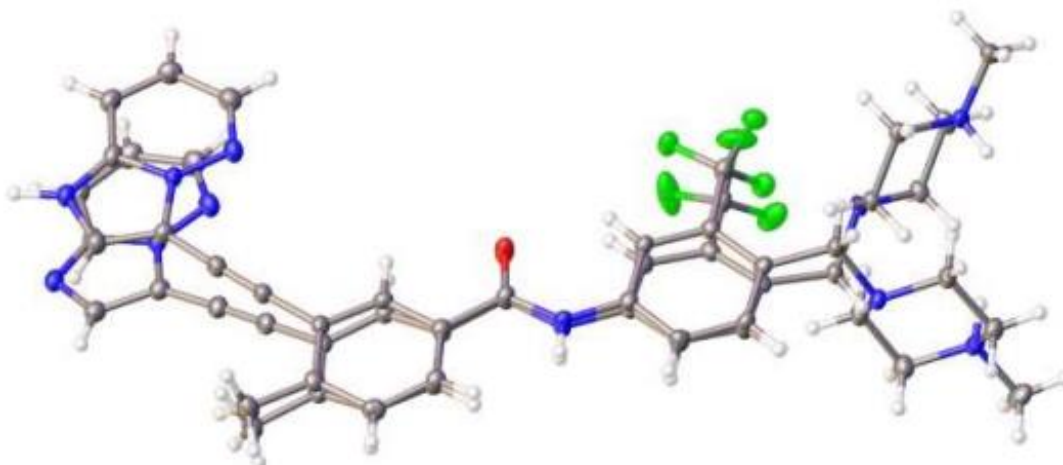

**Figure S4.** Molecular overlay of the ponatinib molecules A and B in the asymmetric unit.

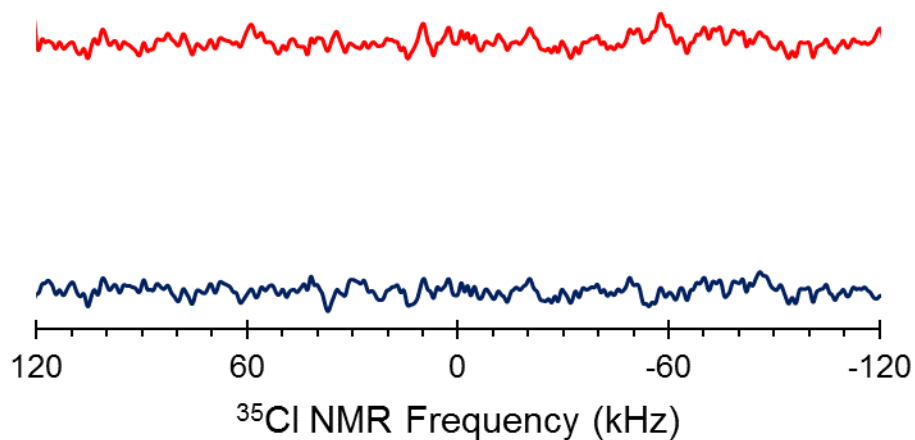

**Figure S5.**  $^{35}\text{Cl}\{^1\text{H}\}$  spectra of **pon·HCl** acquired using a Bloch decay sequence, with relaxation delays of 1.0 s (blue) and 8.0 s (red). Sharp peaks arising from a potential impurity phase are not evident in either spectrum. These spectra were used to detect any potential sources of chloride ions that may be present in the bulk **pon·HCl** material.

## Supplement S1: Supporting Characterization Techniques

**Powder X-ray Diffraction.** PXRD diffractograms were recorded on a Bruker D8 DISCOVER powder X-ray diffractometer. The sample holder was oscillated along X and Y axes during the measurement. The generator was a Micro-focus X-ray source (IMSTube: Cu tube, 1.54184 Å) with a voltage of 50 kV and current of 1.00 mA, using a divergence slit of 0.3 mm and collimator of 0.3 mm. For each sample, one frame was collected ( $2\theta$ : 20.00°, Omega: 5.00°) using a still scan with a Pilatus 3R-100 kA detector over 300 s at the distance of 154.72 mm from the sample. Raw data were evaluated using the program EVA.

**Thermal Analysis.** Thermogravimetric analysis (TGA) and differential scanning calorimetry (DSC) data were collected using a Mettler Toledo TGA/SDTA851e Thermogravimetric Analyzer and Mettler Toledo DSC821e Differential Scanning Calorimeter, respectively. Data were collected and processed using the STARe software package. Data collection covered a temperature range of 25 – 300 °C with a heating rate of 10 °C min<sup>-1</sup>, and a nitrogen gas purge rate of 85 mL min<sup>-1</sup>.

**Solution-state <sup>1</sup>H NMR.** Solution phase <sup>1</sup>H NMR spectra were acquired using a 400 MHz Bruker Avance spectrometer. All samples were prepared in an acetic acid-*d*<sub>3</sub> solution.

**Potentiometric titrations.** Potentiometric titrations for chloride were conducted using a DM141-SC electrode with a solution of AgNO<sub>3</sub> (0.05 M) as a standard.



## Supplement S2: Calculations of $^1\text{H}$ and $^{13}\text{C}$ Chemical Shifts

Calculated  $^1\text{H}$  and  $^{13}\text{C}$  isotropic magnetic shielding constants were converted to the chemical shift scale through a series of separate calculations on four materials, and comparison with experimental  $^1\text{H}$  and  $^{13}\text{C}$  chemical shifts (**Figure S6**). These materials are glycine (alpha polymorph), glycine hydrochloride, L-histidine hydrochloride monohydrate, and uracil. Structural models for these materials were obtained from single-crystal X-ray diffraction studies, as deposited in the Cambridge Structural Database with CSD code of GLYCIN80, GLYHCL, HISTCM01, and URACIL. Correlations between calculated isotropic magnetic shielding constants and experimental chemical shifts yielded the following expressions from least-squares linear regression analysis:

$$\sigma_{\text{iso}}(^{13}\text{C}) = -1.0564 \cdot \delta_{\text{iso}}(^{13}\text{C}) + 186.93 \text{ ppm} \quad \text{Eq. S1}$$

$$\sigma_{\text{iso}}(^1\text{H}) = -1.0976 \cdot \delta_{\text{iso}}(\text{H}) + 31.63 \text{ ppm} \quad \text{Eq. S2}$$

These equations were used to convert the calculated  $^1\text{H}$  and  $^{13}\text{C}$  isotropic magnetic shielding constants for **pon·HCl** to their respective chemical shift scales. Similarly, the calculated  $^{35}\text{Cl}$  isotropic magnetic shielding constant of **pon·HCl** was converted to the chemical shift by setting the calculated shielding constant for L-histidine hydrochloride monohydrate to 34.5 ppm from aqueous NaCl.

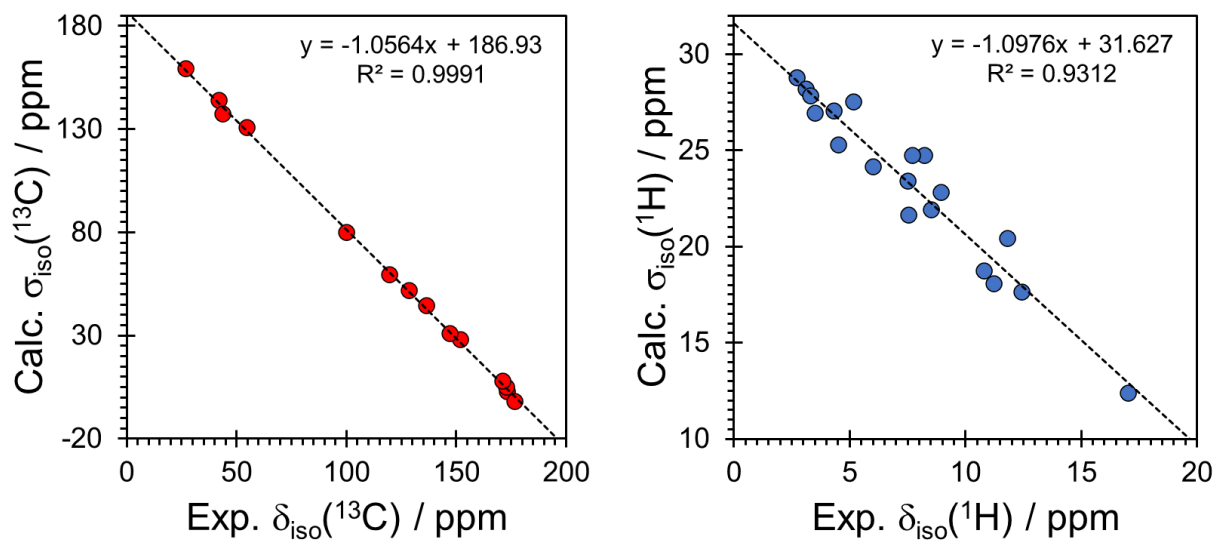

**Figure S6.** Correlations between calculated isotropic magnetic shielding and experimental chemical shifts for L-histidine HCl·H<sub>2</sub>O. Results are shown for  $^1\text{H}$  (left) and  $^{13}\text{C}$  (right). Calculations were performed at the PBE0 level, as describe in the main text.

**Table S5.** Summary of calculated  $^{13}\text{C}$  isotropic chemical shifts for **pon·HCl**.

| Carbon Label      | Moiety                   | Calc. Shift (ppm) | Carbon Label      | Moiety               | Calc. Shift (ppm) |
|-------------------|--------------------------|-------------------|-------------------|----------------------|-------------------|
| <b>Molecule A</b> |                          |                   | <b>Molecule B</b> |                      |                   |
| 1a                | aromatic, protonated     | 151.1             | 1b                | aromatic, protonated | 144.0             |
| 2a                | aromatic, protonated     | 126.8             | 2b                | aromatic, protonated | 122.1             |
| 3a                | aromatic, protonated     | 126.0             | 3b                | aromatic, protonated | 129.1             |
| 4a                | aromatic, non-protonated | 133.5             | 4b                | aromatic, protonated | 138.2             |
| 5a                | aromatic, protonated     | 130.7             | 5b                | aromatic, protonated | 140.3             |
| 6a                | aromatic, protonated     | 115.8             | 6b                | aromatic, protonated | 114.3             |
| 7a                | acetylenic               | 84.5              | 7b                | acetylenic           | 91.4              |
| 8a                | acetylenic               | 103.5             | 8b                | acetylenic           | 104.1             |
| 9a                | aromatic, protonated     | 119.1             | 9b                | aromatic, protonated | 124.5             |
| 10a               | aromatic, protonated     | 133.9             | 10b               | aromatic, protonated | 132.1             |
| 11a               | aromatic, protonated     | 129.2             | 11b               | aromatic, protonated | 128.2             |
| 12a               | aromatic, protonated     | 130.6             | 12b               | aromatic, protonated | 126.7             |
| 13a               | aromatic, protonated     | 134.5             | 13b               | aromatic, protonated | 129.0             |
| 14a               | aromatic, protonated     | 146.0             | 14b               | aromatic, protonated | 147.4             |
| 15a               | R-CH <sub>3</sub>        | 22.8              | 15b               | R-CH <sub>3</sub>    | 26.9              |
| 16a               | amide                    | 161.4             | 16b               | amide                | 160.4             |
| 17a               | aromatic, protonated     | 138.1             | 17b               | aromatic, protonated | 137.5             |
| 18a               | aromatic, protonated     | 123.4             | 18b               | aromatic, protonated | 121.4             |
| 19a               | aromatic, protonated     | 133.2             | 19b               | aromatic, protonated | 131.3             |
| 20a               | aromatic, protonated     | 131.6             | 20b               | aromatic, protonated | 134.2             |
| 21a               | aromatic, protonated     | 128.6             | 21b               | aromatic, protonated | 130.4             |
| 22a               | aromatic, protonated     | 117.5             | 22b               | aromatic, protonated | 117.6             |
| 23a               | CF <sub>3</sub>          | 131.5             | 23b               | CF <sub>3</sub>      | 131.3             |
| 24a               | CH <sub>2</sub>          | 56.6              | 24b               | CH <sub>2</sub>      | 57.1              |
| 25a               | CH <sub>2</sub>          | 51.5              | 25b               | CH <sub>2</sub>      | 51.0              |
| 26a               | CH <sub>2</sub>          | 52.8              | 26b               | CH <sub>2</sub>      | 54.9              |
| 27a               | CH <sub>2</sub>          | 51.0              | 27b               | CH <sub>2</sub>      | 51.0              |
| 28a               | CH <sub>2</sub>          | 47.8              | 28b               | CH <sub>2</sub>      | 48.2              |
| 29a               | N-CH <sub>3</sub>        | 42.2              | 29b               | N-CH <sub>3</sub>    | 42.1              |

**Table S6.** Summary of calculated  $^1\text{H}$  isotropic chemical shifts for **pon·HCl**.

| Hydrogen Label    | Moiety            | Calc. Shift (ppm) | Hydrogen Label    | Moiety            | Calc. Shift (ppm) | Hydrogen Label | Calc. Shift (ppm) |
|-------------------|-------------------|-------------------|-------------------|-------------------|-------------------|----------------|-------------------|
| <b>Molecule A</b> |                   |                   | <b>Molecule B</b> |                   |                   | <b>Waters</b>  |                   |
| H1A               | imidazopyridazine | 18.2              |                   |                   |                   | H1C,D          | 4.1               |
| H1AA              | aromatic          | 10.5              | H1B               | aromatic          | 8.5               | H2C,D          | 4.0               |
| H2A               | aromatic          | 8.9               | H2B               | aromatic          | 8.8               | H3C,D          | 5.1               |
| H3A               | aromatic          | 7.7               | H3B               | aromatic          | 8.7               |                |                   |
| H4A               | amide             | 7.6               | H4B               | amide             | 6.0               |                |                   |
| H5A               | aromatic          | 10.6              | H5B               | aromatic          | 9.6               |                |                   |
| H6A               | amine             | 8.1               | H6B               | amine             | 6.2               |                |                   |
| H10A              | aromatic          | 7.3               | H10B              | aromatic          | 7.8               |                |                   |
| H12A              | aromatic          | 9.2               | H12B              | aromatic          | 8.1               |                |                   |
| H13A              | aromatic          | 8.1               | H13B              | aromatic          | 7.4               |                |                   |
| H15A,B,C          | R-CH <sub>3</sub> | -0.4              | H15D,E,F          | R-CH <sub>3</sub> | 3.4               |                |                   |
| H18A              | aromatic          | 8.3               | H18B              | aromatic          | 7.5               |                |                   |
| H19A              | aromatic          | 7.4               | H19B              | aromatic          | 6.9               |                |                   |
| H22A              | aromatic          | 8.5               | H22B              | aromatic          | 8.2               |                |                   |
| H24A,B            | CH <sub>2</sub>   | 2.9               | H24C,D            | CH <sub>2</sub>   | 2.0               |                |                   |
| H25A,B            | CH <sub>2</sub>   | 3.3               | H25C,D            | CH <sub>2</sub>   | 3.6               |                |                   |
| H26A,B            | CH <sub>2</sub>   | 3.9               | H26C,D            | CH <sub>2</sub>   | 4.1               |                |                   |
| H27A,B            | CH <sub>2</sub>   | 5.0               | H27C,D            | CH <sub>2</sub>   | 4.5               |                |                   |
| H28A,B            | CH <sub>2</sub>   | 3.2               | H28C,D            | CH <sub>2</sub>   | 3.1               |                |                   |
| H29A,B,C          | N-CH <sub>3</sub> | 3.7               | H29D,E,F          | N-CH <sub>3</sub> | 4.2               |                |                   |

### Supplement S3:

Previous work has demonstrated that those hydrogen bonds with  $\text{H}\cdots\text{Cl}^-$  distances of 2.2 Å or less, which we refer to as *short contacts*, most strongly influence the signs, magnitudes, and orientations of the principal components of  $^{35}\text{Cl}$  EFG tensors; similarly, hydrogen bonds up to 2.6 Å<sup>1</sup> may impact the EFGs, but their effects are typically less significant when short contacts are also present.<sup>2-5</sup> For a chloride ion featuring a single short contact, DFT calculations typically predict that the sign of  $C_Q$  is negative and the largest principal component,  $V_{33}$ , resides close to the hydrogen bonding axis (*i.e.*, the value of the EFG is positive along this axis, since  $Q(^{35}\text{Cl}) = -8.112 \text{ fm}^2$ ).<sup>6</sup> Chloride ions featuring two short contacts oriented with an angle near  $\angle(\text{H}-\text{Cl}-\text{H}) = 180^\circ$  behave analogously to one-contact systems.<sup>5</sup> Both of these spatial arrangements tend to have large associated values of  $C_Q$  and values of  $\eta_Q$  near zero (*i.e.*, axial or near-axial symmetry). In contrast, chloride ions featuring two short contacts in which  $\angle(\text{H}-\text{Cl}-\text{H}) \neq 180^\circ$  are predicted to have positive values of  $C_Q$ , with  $V_{33}$  oriented approximately perpendicular to the plane formed by the short contacts. These sites typically have lower magnitudes of  $C_Q$ , as well as values of  $\eta_Q$  that deviate from axial symmetry. Furthermore, chloride sites featuring hydrogen bonds involving water molecules have recently been investigated.<sup>7</sup> When systems lack short contacts, the EFGs are influenced by many weak interactions, and the relationships between EFGs and structure are less obvious; these sites must be considered on a case-by-case basis.

## References

- (1) Steiner, T. Hydrogen-bond distances to halide ions in organic and organometallic crystal structures: up-to-date database study. *Acta Crystallogr., Sect. B* **1998**, *54*, 456-463.
- (2) Hamaed, H.; Pawlowski, J. M.; Cooper, B. F. T.; Fu, R.; Eichhorn, S. H.; Schurko, R. W. Application of solid-state  $^{35}\text{Cl}$  NMR to the structural characterization of hydrochloride pharmaceuticals and their polymorphs. *J. Am. Chem. Soc.* **2008**, *130*, 11056-11065.
- (3) Hildebrand, M.; Hamaed, H.; Namespetra, A. M.; Donohue, J. M.; Fu, R.; Hung, I.; Gan, Z.; Schurko, R. W.  $^{35}\text{Cl}$  solid-state NMR of HCl salts of active pharmaceutical ingredients: structural prediction, spectral fingerprinting and polymorph recognition. *CrystEngComm* **2014**, *16*, 7334-7356.
- (4) Holmes, S. T.; Hook, J. M.; Schurko, R. W. Nutraceuticals in bulk and dosage forms: analysis by  $^{35}\text{Cl}$  and  $^{14}\text{N}$  solid-state NMR and DFT calculations. *Mol. Pharm.* **2022**, *19*, 440-455.
- (5) Peach, A. A.; Hirsh, D. A.; Holmes, S. T.; Schurko, R. W. Mechanochemical syntheses and  $^{35}\text{Cl}$  solid-state NMR characterization of fluoxetine HCl cocrystals. *CrystEngComm* **2018**, *20*, 2780-2792.
- (6) Pyykkö, P. Year-2017 nuclear quadrupole moments. *Mol. Phys.* **2018**, *116*, 1328-1338.
- (7) Holmes, S. T.; Vojvodin, C. S.; Veinberg, N.; Iacobelli, E. M.; Hirsh, D. A.; Schurko, R. W. Hydrates of active pharmaceutical ingredients: a  $^{35}\text{Cl}$  and  $^2\text{H}$  solid-state NMR and DFT study. *Solid State Nucl. Magn. Reson.* **2022**, *122*, 101837.
